# Supplementary material
Source: ML conference proceedings conference paper supplement (https://proceedings.neurips.cc/paper_files/paper/2016/hash/49c9adb18e44be0711a94e827042f630-Abstract.html)
Supplement: Supplementary file 3 [file 49c9adb18e44be0711a94e827042f630-Supplemental.zip]

Archive with 39 entries (38 files):
- decomp1.png
- __MACOSX/
- __MACOSX/._decomp1.png
- decomp2.png
- __MACOSX/._decomp2.png
- decomp_marg.png
- __MACOSX/._decomp_marg.png
- decompexample.png
- __MACOSX/._decompexample.png
- esHT.png
- __MACOSX/._esHT.png
- g-HTC.png
- __MACOSX/._g-HTC.png
- HT_notID.png
- __MACOSX/._HT_notID.png
- IDex2.png
- __MACOSX/._IDex2.png
- IDexample.png
- __MACOSX/._IDexample.png
- IDexample2.png
- __MACOSX/._IDexample2.png
- isoZ.png
- __MACOSX/._isoZ.png
- isoZ2.png
- __MACOSX/._isoZ2.png
- linear_verma.png
- __MACOSX/._linear_verma.png
- med.png
- __MACOSX/._med.png
- modifiedverma.png
- __MACOSX/._modifiedverma.png
- recursive_decomposition v12_NIPS.aux
- __MACOSX/._recursive_decomposition v12_NIPS.aux
- recursive_decomposition v12_NIPS.bbl
- __MACOSX/._recursive_decomposition v12_NIPS.bbl
- recursive_decomposition v12_NIPS.pdf
- __MACOSX/._recursive_decomposition v12_NIPS.pdf
- recursive_decomposition v12_NIPS.tex
- __MACOSX/._recursive_decomposition v12_NIPS.tex
