# Supplementary material
Source: ML conference proceedings conference paper supplement (https://proceedings.neurips.cc/paper_files/paper/2016/hash/49c9adb18e44be0711a94e827042f630-Abstract.html)
Supplement: Supplementary file 3 [file 49c9adb18e44be0711a94e827042f630-Supplemental.zip › recursive_decomposition v12_NIPS.aux]

\relax 
\citation{balke:pea94a}
\citation{pearl:04}
\citation{wright:21}
\citation{pearl:09}
\citation{huang:val06,shpitser:pea06c}
\citation{tian2005identifying,chen:pea14}
\citation{brito:pea02a}
\citation{brito:04}
\citation{tian2005identifying,tian:07a,tian2009parameter}
\citation{foygel:12}
\citation{chen:etal14}
\@writefile{toc}{\contentsline {section}{\numberline {1}Introduction}{1}}
\citation{pearl:09}
\citation{kang2009markov}
\citation{pearl:09}
\citation{verma:pea90a}
\citation{tian:pea02c}
\citation{shpitser:pea08a}
\citation{chen:etal14}
\citation{tian:pea02c}
\citation{shpitser:pea08a}
\citation{foygel:12}
\citation{chen:etal14}
\citation{tian:02,huang:val06,shpitser:pea06c}
\citation{pearl:04}
\@writefile{toc}{\contentsline {section}{\numberline {2}Preliminaries}{2}}
\citation{pearl:09}
\citation{foygel:12}
\citation{chen:etal14}
\citation{foygel:12}
\citation{foygel:12}
\citation{foygel:12}
\citation{chen:etal14}
\citation{foygel:12}
\citation{foygel:12}
\citation{brito:pea02a}
\citation{brito:04}
\@writefile{toc}{\contentsline {section}{\numberline {3}General Half-Trek Criterion}{3}}
\citation{chen:etal14}
\citation{brito:04}
\@writefile{lof}{\contentsline {figure}{\numberline {1}{\ignorespaces The above model is identified using the g-HTC but not the HTC.\relax }}{4}}
\providecommand*\caption@xref[2]{\@setref\relax\@undefined{#1}}
\newlabel{fig:IDexample2}{{1}{4}}
\newlabel{def:allow}{{8}{4}}
\newlabel{thm:htID}{{1}{4}}
\citation{chen:etal14}
\citation{tian2005identifying}
\citation{tian2005identifying}
\citation{tian:02}
\citation{tian:pea02}
\newlabel{fig:decomp}{{2a}{5}}
\newlabel{sub@fig:decomp}{{a}{5}}
\newlabel{fig:decomp_marg}{{2b}{5}}
\newlabel{sub@fig:decomp_marg}{{b}{5}}
\newlabel{fig:decomp1}{{2c}{5}}
\newlabel{sub@fig:decomp1}{{c}{5}}
\newlabel{fig:decomp2}{{2d}{5}}
\newlabel{sub@fig:decomp2}{{d}{5}}
\@writefile{lof}{\contentsline {figure}{\numberline {2}{\ignorespaces (a) The graph is not identified using the g-HTC and cannot be decomposed (b) After removing $V_6$ we are able to decompose the graph (c) Graph for c-component, $\{V_2 , V_3 , V_5\}$ (d) Graph for c-component, $\{V_1 , V_4\}$\relax }}{5}}
\@writefile{toc}{\contentsline {section}{\numberline {4}Generalizing Overidentifying Constraints}{5}}
\newlabel{thm:constraint}{{2}{5}}
\@writefile{toc}{\contentsline {section}{\numberline {5}Decomposition}{5}}
\newlabel{sec:c-comp}{{5}{5}}
\citation{tian:pea02c}
\citation{shpitser:pea08a}
\citation{tian:pea02c}
\citation{shpitser:pea08a}
\citation{tian:pea02c}
\citation{tian:pea02c}
\citation{tian:pea02}
\citation{tian:pea02}
\citation{tian:pea02}
\citation{tian:pea02c}
\newlabel{fig:isoZ}{{3a}{7}}
\newlabel{sub@fig:isoZ}{{a}{7}}
\newlabel{fig:isoZ2}{{3b}{7}}
\newlabel{sub@fig:isoZ2}{{b}{7}}
\@writefile{lof}{\contentsline {figure}{\numberline {3}{\ignorespaces (a) $V_1$ cannot be d-separated from $V_7$ (b) $V_1$ is d-separated from $V_7$ in the graph of the c-component, $\{V_2 , V_5 , V_7\}$\relax }}{7}}
\newlabel{thm:npid}{{3}{7}}
\@writefile{toc}{\contentsline {section}{\numberline {6}Non-Parametric Verma Constraints}{7}}
\@writefile{toc}{\contentsline {subsection}{\numberline {6.1}Q-Constraints}{7}}
\newlabel{def:Q-factor}{{9}{7}}
\newlabel{eq:q}{{3}{7}}
\newlabel{lem:c-comp}{{1}{7}}
\newlabel{eq:marg}{{4}{7}}
\citation{shpitser:pea08a}
\citation{foygel:12}
\citation{chen:15}
\citation{drton:wei16}
\bibdata{book}
\@writefile{lof}{\contentsline {figure}{\numberline {4}{\ignorespaces The above graph induces the Verma constraint, $Q[v_4]$ is not a function of $v_1$, and equivalently, $v_4 \perp v_1 | do(v_3)$.\relax }}{8}}
\newlabel{fig:verma}{{4}{8}}
\newlabel{thm:Qsubsumed}{{4}{8}}
\@writefile{toc}{\contentsline {subsection}{\numberline {6.2}Dormant Independences}{8}}
\newlabel{lem:DI}{{2}{8}}
\newlabel{thm:DIsubsumed}{{5}{8}}
\@writefile{toc}{\contentsline {section}{\numberline {7}Conclusion}{8}}
\bibcite{balke:pea94a}{{1}{1994}{{Balke and Pearl}}{{}}}
\bibcite{brito:04}{{2}{2004}{{Brito}}{{}}}
\bibcite{brito:pea02a}{{3}{2002}{{Brito and Pearl}}{{}}}
\bibcite{chen:15}{{4}{2015}{{Chen}}{{}}}
\bibcite{chen:pea14}{{5}{2014}{{Chen and Pearl}}{{}}}
\bibcite{chen:etal14}{{6}{2014}{{Chen et~al.}}{{Chen, Tian and Pearl}}}
\bibcite{drton:wei16}{{7}{2016}{{Drton and Weihs}}{{}}}
\bibcite{foygel:12}{{8}{2012}{{Foygel et~al.}}{{Foygel, Draisma and Drton}}}
\bibcite{huang:val06}{{9}{2006}{{Huang and Valtorta}}{{}}}
\bibcite{kang2009markov}{{10}{2009}{{Kang and Tian}}{{}}}
\bibcite{pearl:04}{{11}{2004}{{Pearl}}{{}}}
\bibcite{pearl:09}{{12}{2009}{{Pearl}}{{}}}
\bibcite{shpitser:pea06c}{{13}{2006}{{Shpitser and Pearl}}{{}}}
\bibcite{shpitser:pea08a}{{14}{2008}{{Shpitser and Pearl}}{{}}}
\bibcite{tian:02}{{15}{2002}{{Tian}}{{}}}
\bibcite{tian2005identifying}{{16}{2005}{{Tian}}{{}}}
\bibcite{tian:07a}{{17}{2007}{{Tian}}{{}}}
\bibcite{tian2009parameter}{{18}{2009}{{Tian}}{{}}}
\bibcite{tian:pea02}{{19}{2002{a}}{{Tian and Pearl}}{{}}}
\bibcite{tian:pea02c}{{20}{2002{b}}{{Tian and Pearl}}{{}}}
\bibcite{verma:pea90a}{{21}{1990}{{Verma and Pearl}}{{}}}
\bibcite{wright:21}{{22}{1921}{{Wright}}{{}}}
\bibstyle{ims}
\@writefile{toc}{\contentsline {section}{\numberline {8}Acknowledgments}{9}}
