# Supplementary material
Source: ML conference proceedings conference paper supplement (https://proceedings.neurips.cc/paper_files/paper/2016/hash/49c9adb18e44be0711a94e827042f630-Abstract.html)
Supplement: Supplementary file 3 [file 49c9adb18e44be0711a94e827042f630-Supplemental.zip › recursive_decomposition v12_NIPS.bbl]

\begin{thebibliography}{23}
\expandafter\ifx\csname natexlab\endcsname\relax\def\natexlab#1{#1}\fi
\expandafter\ifx\csname url\endcsname\relax
  \def\url#1{\texttt{#1}}\fi
\expandafter\ifx\csname urlprefix\endcsname\relax\def\urlprefix{URL }\fi

\bibitem[{Balke and Pearl(1994)}]{balke:pea94a}
\textsc{Balke, A.} and \textsc{Pearl, J.} (1994).
\newblock Probabilistic evaluation of counterfactual queries.
\newblock In \textit{Proceedings of the 12th National Conference on
  Artificial Intelligence}, vol.~I. MIT Press.

\bibitem[{Brito(2004)}]{brito:04}
\textsc{Brito, C.} (2004).
\newblock \textit{Graphical methods for identification in structural equation
  models}.
\newblock Ph.D. thesis, Computer Science Department, University of California,
  Los Angeles, CA.

\bibitem[{Brito and Pearl(2002)}]{brito:pea02a}
\textsc{Brito, C.} and \textsc{Pearl, J.} (2002).
\newblock Generalized instrumental variables.
\newblock In \textit{Uncertainty in Artificial Intelligence, Proceedings of the
  18th Conference}. Morgan Kaufmann.

\bibitem[{Chen(2015)}]{chen:15}
\textsc{Chen, B.} (2015).
\newblock Decomposition and identification of linear structural equation
  models.
\newblock \textit{arXiv preprint arXiv:1508.01834} .

\bibitem[{Chen and Pearl(2014)}]{chen:pea14}
\textsc{Chen, B.} and \textsc{Pearl, J.} (2014).
\newblock Graphical tools for linear structural equation modeling.
\newblock Tech. Rep. R-432, Department of Computer
  Science, UCLA.
\newblock Forthcoming, \emph{Psychometrika}.

\bibitem[{Chen et~al.(2014)Chen, Tian and Pearl}]{chen:etal14}
\textsc{Chen, B.}, \textsc{Tian, J.} and \textsc{Pearl, J.} (2014).
\newblock Testable implications of linear structual equation models.
\newblock In \textit{Proceedings of the 28th AAAI Conference on
  Artificial Intelligence}. AAAI Press.

\bibitem[{Drton and Weihs(2016)}]{drton:wei16}
\textsc{Drton, M.} and \textsc{Weihs, L.} (2016).
\newblock Generic identifiability of linear structural equation models by
  ancestor decomposition.
\newblock \textit{Scandinavian Journal of Statistics}.

\bibitem[{Foygel et~al.(2012)Foygel, Draisma and Drton}]{foygel:12}
\textsc{Foygel, R.}, \textsc{Draisma, J.} and \textsc{Drton, M.} (2012).
\newblock Half-trek criterion for generic identifiability of linear structural
  equation models.
\newblock \textit{The Annals of Statistics} \textbf{40}.

\bibitem[{Huang and Valtorta(2006)}]{huang:val06}
\textsc{Huang, Y.} and \textsc{Valtorta, M.} (2006).
\newblock Pearl's calculus of intervention is complete.
\newblock In \textit{Proceedings of the 22nd Conference on Uncertainty
  in Artificial Intelligence}. AUAI Press.

\bibitem[{Kang and Tian(2009)}]{kang2009markov}
\textsc{Kang, C.} and \textsc{Tian, J.} (2009).
\newblock Markov properties for linear causal models with correlated errors.
\newblock \textit{The Journal of Machine Learning Research}.

\bibitem[{Pearl(2004)}]{pearl:04}
\textsc{Pearl, J.} (2004).
\newblock Robustness of causal claims.
\newblock In \textit{Proceedings of the Twentieth Conference Uncertainty in
  Artificial Intelligence} (M.~Chickering and J.~Halpern, eds.). AUAI Press.

\bibitem[{Pearl(2009)}]{pearl:09}
\textsc{Pearl, J.} (2009).
\newblock \textit{Causality: Models, Reasoning, and Inference}.
\newblock 2nd ed. Cambridge University Press, NY.

\bibitem[{Shpitser and Pearl(2006)}]{shpitser:pea06c}
\textsc{Shpitser, I.} and \textsc{Pearl, J.} (2006).
\newblock Identification of conditional interventional distributions.
\newblock In \textit{Proceedings of the 22nd Conference on Uncertainty
  in Artificial Intelligence}. AUAI Press.

\bibitem[{Shpitser and Pearl(2008)}]{shpitser:pea08a}
\textsc{Shpitser, I.} and \textsc{Pearl, J.} (2008).
\newblock Dormant independence.
\newblock In \textit{Proceedings of the 23rd Conference on Artificial
  Intelligence}. AAAI Press.

\bibitem[{Tian(2002)}]{tian:02}
\textsc{Tian, J.} (2002).
\newblock \textit{Studies in Causal Reasoning and Learning}.
\newblock Ph.D. thesis, Computer Science Department, University of California,
  Los Angeles, CA.

\bibitem[{Tian(2005)}]{tian2005identifying}
\textsc{Tian, J.} (2005).
\newblock Identifying direct causal effects in linear models.
\newblock In \textit{Proceedings of the National Conference on Artificial
  Intelligence}, vol.~20. AAAI Press;
  MIT Press; 1999.

\bibitem[{Tian(2007)}]{tian:07a}
\textsc{Tian, J.} (2007).
\newblock A criterion for parameter identification in structural equation
  models.
\newblock In \textit{Proceedings of the 23rd Conference Annual
  Conference on Uncertainty in Artificial Intelligence}. AUAI Press.

\bibitem[{Tian(2009)}]{tian2009parameter}
\textsc{Tian, J.} (2009).
\newblock Parameter identification in a class of linear structural equation
  models.
\newblock In \textit{Proceedings of the 21st International Joint
  Conference on Artificial Intelligence (IJCAI-09)}.

\bibitem[{Tian and Pearl(2002{\natexlab{a}})}]{tian:pea02}
\textsc{Tian, J.} and \textsc{Pearl, J.} (2002{\natexlab{a}}).
\newblock A general identification condition for causal effects.
\newblock In \textit{Proceedings of the 18th National Conference on
  Artificial Intelligence}. AAAI Press/The MIT Press.

\bibitem[{Tian and Pearl(2002{\natexlab{b}})}]{tian:pea02c}
\textsc{Tian, J.} and \textsc{Pearl, J.} (2002{\natexlab{b}}).
\newblock On the testable implications of causal models with hidden variables.
\newblock In \textit{Proceedings of the 18th Conference on Uncertainty in
  Artificial Intelligence}. Morgan
  Kaufmann.

\bibitem[{Verma and Pearl(1990)}]{verma:pea90a}
\textsc{Verma, T.} and \textsc{Pearl, J.} (1990).
\newblock Equivalence and synthesis of causal models.
\newblock In \textit{Proceedings of the 6th Conference on Uncertainty in
  Artificial Intelligence}. Cambridge, MA.
  
\bibitem[{Wright(1921)}]{wright:21}
\textsc{Wright, S.} (1921).
\newblock Correlation and causation.
\newblock \textit{Journal of Agricultural Research}.

\end{thebibliography}
