# Supplementary material
Source: ML conference proceedings conference paper supplement (https://proceedings.neurips.cc/paper_files/paper/2016/hash/49c9adb18e44be0711a94e827042f630-Abstract.html)
Supplement: Supplementary file 3 [file 49c9adb18e44be0711a94e827042f630-Supplemental.zip › recursive_decomposition v12_NIPS.tex]

\documentclass{article}

% if you need to pass options to natbib, use, e.g.:
% \PassOptionsToPackage{numbers, compress}{natbib}
% before loading nips_2016
%
% to avoid loading the natbib package, add option nonatbib:
% \usepackage[nonatbib]{nips_2016}

\usepackage[final]{nips_2016}

\usepackage[utf8]{inputenc} % allow utf-8 input
\usepackage[T1]{fontenc}    % use 8-bit T1 fonts
%\usepackage{hyperref}       % hyperlinks
\usepackage{url}            % simple URL typesetting
\usepackage{booktabs}       % professional-quality tables
\usepackage{amsfonts}       % blackboard math symbols
\usepackage{nicefrac}       % compact symbols for 1/2, etc.
\usepackage{microtype}      % microtypography

\usepackage{tabularx,array,enumerate,amsmath}
\usepackage{graphicx}
%\usepackage[english]{babel}
%\usepackage[margin=1in]{geometry}
%\usepackage{natbib}
\usepackage{amsthm}
%\usepackage{enumerate}
\usepackage{algorithm}
\usepackage{algorithmicx}
\usepackage{algpseudocode}
\usepackage{caption}
\usepackage{subcaption}
\usepackage[multiple]{footmisc}
\usepackage{amssymb}
\usepackage{accents}

\newtheorem{mydef}{Definition}
\newtheorem{theorem}{Theorem}
\newtheorem{notation}{Notation}
\newtheorem{lemma}{Lemma}
\newtheorem{example}{Example}
\newtheorem{rle}{Rule}
\newtheorem{corollary}{Corollary}
\newtheorem{remark}{Remark}
\newtheorem{property}{Property}
\newtheorem{conjecture}{Conjecture}

\renewcommand{\algorithmicrequire}{\textbf{Input:}}
\renewcommand{\algorithmicensure}{\textbf{Output:}}
\renewcommand{\algorithmicforall}{\textbf{for each}}
%\newcommand{\theHalgorithm}{\arabic{algorithm}}
\newcommand{\indep}{\rotatebox[origin=c]{90}{$\models$}}
\newcommand{\notindep}{\not\!\perp\!\!\!\perp}
\newcommand\munderbar[1]{%
  \underaccent{\bar}{#1}}

\def\bibfont{\small}

\newenvironment{claim}[1]{\par\noindent\underbar{Claim:}\space#1}{}
\newenvironment{claimproof}[1]{\par\noindent\underbar{Proof:}\space#1}{\hfill $\blacksquare$}

\title{Identification and Overidentification of \\Linear Structural Equation Models} 
\author{Bryant Chen\\ 
University of California, Los Angeles \\
Computer Science Department\\
Los Angeles, CA, 90095-1596, USA \\
} 


\begin{document}

\maketitle

%\section{Note Regarding the Edge Set Half-Trek Criterion}
%
%\begin{figure}
%\caption{}
%\label{fig:HT_notID}
%\centering
%\includegraphics[width=0.35\textwidth]{HT_notID.png}
%\end{figure}
%
%\citet{chen:etal14} gave an extension of the half-trek criterion of \citet{foygel:12}, which they claimed was able to identify additional coefficients in under-identified models.  In fact, the edge set half-trek criterion allows the identification of entire models that the original half-trek criterion was unable to.  The graph depicted in Figure \ref{fig:HT_notID} is not identified using the original half-trek criterion.  $V_4$ is HT-reachable from $V_2$ and as a result $V_4$ is not an allowed node for $V_2$ until it is identified.  Similarly, $V_2$ is HT-reachable from $V_4$ and is not allowed for $V_4$ until it is identified.  However, using the extended half-trek criterion, $a$ is identified using $V_1$ since it represents a separate connected edge set from $d$.  Once $a$ is identified, $c$ can be identified using $V_2$ since $V_2$'s e

\begin{abstract}
In this paper, we address the problems of identifying linear structural equation models and discovering the constraints they imply. We first extend the half-trek criterion to cover a broader class of models and apply our extension to finding testable constraints implied by the model. We then show that any semi-Markovian linear model can be recursively decomposed into simpler sub-models, resulting in improved identification and constraint discovery power. Finally, we show that, unlike the existing methods developed for linear models, the resulting method subsumes the identification and constraint discovery algorithms for non-parametric models.
\end{abstract}


%In this paper, we present novel algorithms for the identification of coefficients in linear structural equation models (SEMs) and the discovery of (generalized) overidentifying constraints that can be used to test the model.  We first extend the edge set half-trek criterion \citep{chen:etal14} in order to discover more coefficients in underidentified models.  We then incorporate recursive c-component decomposition, which was utilized in complete, non-parametric causal effect identification algorithms \citep{tian:02,huang:val06,shpitser:pea06c}.  The resulting method is able to identify more models and coefficients than the half-trek and edge set half-trek criterions \citep{foygel:12,chen:etal14} and, unlike existing linear algorithms, subsumes non-parametric algorithms when applied to the identification of linear coefficients.  We then generalize the notion of overidentification 
\section{Introduction}

Many researchers, particularly in economics, psychology, and the social sciences, use linear structural equation models (SEMs) to describe the causal and statistical relationships between a set of variables,  predict the effects of interventions and policies, and to estimate parameters of interest.  When modeling using linear SEMs, researchers typically specify the causal structure (i.e. exclusion restrictions and independence restrictions between error terms) from domain knowledge, leaving the structural coefficients (representing the strength of the causal relationships) as free parameters to be estimated from data.  If these coefficients are known, then total effects, direct effects, and counterfactuals can be computed from them directly \citep{balke:pea94a}.  However, in some cases, the causal assumptions embedded in the model are not enough to uniquely determine one or more coefficients from the probability distribution, and therefore, cannot be estimated using data.  In such cases, we say that the coefficient is \emph{not identified} or \emph{not identifiable}\footnote{We will also use the term ``identified" with respect to individual variables and the model as a whole.}.  

%Many SEM researchers determine the identifiability of the model by submitting the specification and data to software, which attempts to estimate the coefficients by minimizing a fitting function \citep{kenny2011identification}.  If the model is not identified, then the program will be unable to complete the estimation and warns that the model may not be identified.   While convenient, there are disadvantages to using typical SEM software to determine model identifiability \citep{kenny2011identification,chen:pea14}.  If poor starting values are chosen, the program could mistakenly conclude the model is not identified when in fact it may be identified.  When the model is not identified, the program is not helpful in indicating which parameters are not identified nor are they able to provide estimates for identifiable coefficients\footnote{According to \citet{kenny2011identification}, AMOS is the only program that attempts to estimate parameters when the model is not identified.}.  Most importantly, the program only gives an answer after the researcher has taken the time to collect data.  

%Rather than determining the identifiability of parameters by attempting to fit the model, we will detect identifiability directly from the model specification and express identified parameters in terms of the population covariance matrix.  As a result, the modeler can estimate their values, even when the model, as a whole, is not identified.  Additionally, we avoid issues of poor starting values and can determine the identifiability of parameters prior to collecting data.  

In other cases, a coefficient may be \emph{overidentified} in addition to being identified, meaning that there are at least two minimal sets of logically independent assumptions in the model that are sufficient for identifying a coefficient, and the identified expressions for the coefficient are distinct functions of the covariance matrix \citep{pearl:04}.  As a result, the model imposes a testable constraint on the probability distribution that the two (or more) identified expressions for the coefficient are equal.  %Moreover, this constraint is an implication of the model assumptions used in the identification of the overidentified coefficient.  As a result, if it holds in the data, then the identified expressions for the coefficient are supported by data.  

%Typically, identification, estimation, and testing of SEMs are conducted by submitting the specification and data to an SEM program, which attempts to estimate the parameters by minimizing a fitting function and test the model by comparing the covariance matrix implied by the estimated values to the sample covariance matrix.  While convenient, \citet{kenny2011identification}, \citet{bollen:pea393}, \citet{mcdonald:02b}, \citet{chen:etal14}, and \citet{chen:pea14} have listed a numerous drawbacks to this approach.  

%Model testing using overidentifying constraints have a number of advantages over the more commonly used likelihood ratio or chi-square test \citep{bollen:89,shipley:97}.  For example, when the testable implications (e.g. overidentifying constraints) of the model are tested individually, the power of each test is greater than that of a global test \citep{bollen:pea393,mcdonald:02b}, and the modeler knows exactly which constraint was violated in the case of failure.  Moreover, unlike a global test, the model, as a whole, need not be identified.

%PERHAPS ADD A PARAGRAPH HERE ABOUT HOW SEMs ARE GENERALLY IDENTIFIED

As compact and transparent representations of the model's structure, causal graphs provide a convenient tool to aid in the identification of coefficients.  First utilized as a causal inference tool by \citet{wright:21}, graphs have more recently been applied to identify causal effects in non-parametric causal models \citep{pearl:09} and enabled the development of causal effect identification algorithms that are complete for non-parametric models \citep{huang:val06,shpitser:pea06c}.  These algorithms can be applied to the identification of coefficients in linear SEMs by identifying non-parametric direct effects, which are closely related to structural coefficients \citep{tian2005identifying,chen:pea14}.  Algorithms designed specifically for the identification of linear SEMs were developed by \citet{brito:pea02a}, \citet{brito:04}, \citet{tian2005identifying,tian:07a,tian2009parameter}, \citet{foygel:12}, and \citet{chen:etal14}.  

Graphs have also proven to be valuable tools in the discovery of testable implications.  It is well known that conditional independence relationships can be easily read from the causal graph using d-separation \citep{pearl:09}, and \citet{kang2009markov} gave a procedure for linear SEMs that enumerates a set of conditional independences that imply all others.   In non-parametric models without latent variables or correlated error terms, these conditional independence constraints represent all of the testable implications of the model \citep{pearl:09}.  In models with latent variables and/or correlated error terms, there may be additional constraints implied by the model.  These non-independence constraints, often called \emph{Verma constraints}, were first noted by \citet{verma:pea90a}, and \citet{tian:pea02c} and \citet{shpitser:pea08a} developed graphical algorithms for systematically discovering such constraints in non-parametric models.  In the case of linear models, \citet{chen:etal14} applied their aforementioned identification method to the discovery of overidentifying constraints, which in some cases are equivalent to the non-parametric constraints enumerated in \citet{tian:pea02c} and \citet{shpitser:pea08a}.  %Finally, in latent variable models non-conditional independence constraints can take the form of vanishing tetrads.  A tetrad is the difference in the product of pairs of covariances (e.g. $\sigma_{12} \sigma_{34}-\sigma_{13} \sigma_{24}$) and the structure of a linear SEM typically implies that some of the tetrads vanish while others do not \citep{bollen:pea393,spearman1904general}.  

Surprisingly, naively applying algorithms designed for non-parametric models to linear models enables the identification of coefficients and constraints that the aforementioned methods developed for linear models are unable to, despite utilizing the additional assumption of linearity.  In this paper, we first extend the half-trek identification method of \citet{foygel:12} and apply it to the discovery of \emph{half-trek constraints}, which generalize the overidentifying constraints given in \citet{chen:etal14}.  Our extensions can be applied to Markovian, semi-Markovian, and non-Markovian models.  We then demonstrate how recursive c-component decomposition, which was first utilized in identification algorithms developed for non-parametric models \citep{tian:02,huang:val06,shpitser:pea06c}, can be incorporated into our linear identification and constraint discovery methods for Markovian and semi-Markovian models.  We show that doing so allows the identification of additional models and constraints.  Further, we will demonstrate that, unlike existing algorithms, our method subsumes the aforementioned identification and constraint discovery methods developed for non-parametric models when applied to linear SEMs.  %Lastly, we note that our method is not complete and there are identifiable coefficients and testable implications in certain models that cannot be identified using the methods given.

%In this paper, we first extend the half-trek identification methods of \citet{foygel:12} and \citet{chen:etal14} to identify more coefficients in underidentified models.  We then apply We then show how recursive c-component decomposition, which was first utilized in non-parametric identification algorithms \citep{tian:02,huang:val06,shpitser:pea06c}, can be incorporated into our extended half-trek method in order to identify more recursive models.  We show that this method subsumes both the existing non-parametric \citep{tian:02,huang:val06,shpitser:pea06c} and linear \citep{brito:pea02a,brito:04,tian2005identifying,tian:07a,tian2009parameter,foygel:12,chen:etal14} algorithms.  We then apply our method to the discovery of \emph{half-trek constraints}, a generalization of overidentifying constraints, which we will define.  We explore the relationship of these constraint with the non-parametric Verma constraints of \citet{tian:pea02c} and \citet{shpitser:pea08a} and show that these generalized overidentifying constraints subsume the non-parametric constraints given by \citet{tian:pea02c}, as well as the linear constraints given by \citet{chen:etal14}.

%In this paper, we provide a novel identification method that both extends the existing linear algorithms of \citet{brito:pea02a}, \citet{foygel:12}, and \citet{chen:etal14} and utilizes features of the complete, non-parametric algorithm of \citet{tian:02}.  We show that the resulting identification algorithm subsumes both the existing non-parametric \citep{tian:02,huang:val06,shpitser:pea06c} and linear \citep{brito:pea02a,brito:04,tian2005identifying,tian:07a,tian2009parameter,foygel:12,chen:etal14} algorithms.  We then apply our method to the discovery of \emph{half-trek constraints}, a generalization of overidentifying constraints, which we will define.  We show that these generalized overidentifying constraints subsume the non-parametric constraints given by \citet{tian:pea02c}, as well as the linear constraints given by \citet{chen:etal14}.

\section{Preliminaries}

%A linear structural equation model consists of a set of equations of the form, 
%\begin{equation*}
%x_i = Pa_i^{t}\Lambda_i+\epsilon_i
%\end{equation*}
%where $Pa_i $ (connoting \emph{parents}) is a vector containing the variables that directly determine the value of $x_i$, $\Lambda_i$ is a vector of coefficients that convey the strength of the causal relationships, and $\epsilon_i$ represents errors due to omitted or latent variables and is often assumed to be normally distributed.  However, the results in this paper hold regardless of whether this assumption is made or not.

A linear structural equation model consists of a set of equations of the form, $X = \Lambda X+ \epsilon$, where $X = [x_1 , ... , x_n]^t$ is a vector containing the model variables, $\Lambda$ is a matrix containing the \emph{coefficients} of the model, which convey the strength of the causal relationships, and $\epsilon = [\epsilon_1 , ..., \epsilon_n]^{t}$ is a vector of error terms, which represents omitted or latent variables.  The matrix $\Lambda$ contains zeroes on the diagonal, and $\Lambda_{ij} = 0$ whenever $x_i$ is not a cause of $x_j$.  The error terms are normally distributed random variables and induce the probability distribution over the model variables.  The covariance matrix of $X$ will be denoted by $\Sigma$ and the covariance matrix over the error terms, $\epsilon$, by $\Omega$.

An instantiation of a model $M$ is an assignment of values to the model parameters (i.e. $\Lambda$ and the non-zero elements of $\Omega$).  For a given instantiation $m_i$, let $\Sigma(m_i)$ denote the covariance matrix implied by the model and $\lambda_k (m_i)$ be the value of coefficient $\lambda_k$.  
\begin{mydef}
A coefficient, $\lambda_k$, is \emph{identified} if for any two instantiations of the model, $m_i$ and $m_j$, we have $\lambda_k (m_i) = \lambda_k (m_j)$ whenever $\Sigma(m_i)=\Sigma(m_j)$.
%A coefficient, $\lambda_k$, is \emph{identified} if for almost all pairs of instantiations, $(m_i, m_j)$, \begin{equation}\label{eq:ID}\Sigma(m_i)=\Sigma(m_j)\implies \lambda_k (m_i) = \lambda_k (m_j).\end{equation}  That is, if we view $(m_i, m_j)$ as a point in the space of pairs of instantiations, the set of pairs for which \ref{eq:ID} does not hold has Lebesgue measure zero.  
\end{mydef}
\noindent In other words, $\lambda_k$ is identified if it can be uniquely determined from the covariance matrix, $\Sigma$.  Now, we define when a structural coefficient, $\lambda_k$, is \emph{overidentified}.

\begin{mydef}
\citep{pearl:04} A coefficient, $\lambda_k$ is \emph{overidentified} if there are two or more distinct sets of logically independent assumptions in $M$ such that
\begin{enumerate}[(i)]
\item each set is \emph{sufficient} for deriving $\lambda_k$ as a function of $\Sigma, \lambda_k=f(\Sigma)$,
\item each set induces a \emph{distinct} function $\lambda_k = f(\Sigma)$, and
\item each assumption set is \emph{minimal}, that is, no proper subset of those assumptions is sufficient for the derivation of $\lambda_k$.
\end{enumerate}
\end{mydef}

The causal graph or path diagram of an SEM is a graph, $G=(V,D,B)$, where $V$ are vertices or nodes, $D$ directed edges, and $B$ bidirected edges.  The vertices represent model variables.  Directed eges represent the direction of causality, and for each coefficient $\Lambda_{ij}\neq 0$, an edge is drawn from $x_i$ to $x_j$.  Each directed edge, therefore, is associated with a coefficient in the SEM, which we will often refer to as its structural coefficient.  The error terms, $\epsilon_i$, are not represented in the graph.  However, a bidirected edge between two variables indicates that their corresponding error terms may be statistically dependent while the lack of a bidirected edge indicates that the error terms are independent.  When the causal graph is acyclic without bidirected edges, then we say that the model is \emph{Markovian}.  Graphs with bidirected edges are \emph{non-Markovian}, while acyclic graphs with bidirected edges are additionally called \emph{semi-Markovian}.  

We will use standard graph terminology with $Pa(y)$ denoting the parents of $y$, $Anc(y)$ denoting the ancestors of $y$, $De(y)$ denoting the descendants of $y$, and $Sib(y)$ denoting the siblings of $y$, the variables that are connected to $y$ via a bidirected edge.  $He(E)$ denotes the heads of a set of directed edges, $E$, while $Ta(E)$ denotes the tails.  Additionally, for a node $v$, the set of edges for which $He(E)=v$ is denoted $Inc(v)$.  Lastly, we will utilize d-separation \citep{pearl:09}.

Lastly, we establish a couple preliminary definitions around half-treks.  These definitions and illustrative examples can also be found in \citet{foygel:12} and \citet{chen:etal14}.

%We will also utilize standard terminology around the half-trek criterion, namely the terms \emph{half-trek} and \emph{sided intersection}, whose definitions can be found in \citet{foygel:12} and \citet{chen:etal14}.  We will denote the set of nodes connected to a node, $v$, via half-treks $htr(v)$.  Lastly, we will utilize the following definition:
%

\begin{mydef}
\citep{foygel:12} A \emph{half-trek}, $\pi$, from $x$ to $y$ is a path from $x$ to $y$ that either begins with a bidirected arc and then continues with directed edges towards $y$ or is simply a directed path from $x$ to $y$. 
\end{mydef}
\noindent We will denote the set of nodes that are reachable by half-trek from $v$ $htr(v)$.

%In Figure \ref{fig:eshtexample}, $\pi_1 = V_1 \rightarrow V_2 \rightarrow V_3 \rightarrow V_4 \rightarrow V_7$ is a half-trek from $V_1$ to $V_7$ because is it a directed path from $V_1$ to $V_7$.  $\pi_2 = V_1 \leftrightarrow V_2 \rightarrow V_3 \rightarrow V_4 \rightarrow V_7$ is also a half-trek because it is an unblocked path that begins with a bidirected edge and all of the other edges are directed edges towards $V_7$.  While $\pi_3 = V_7 \leftarrow V_4 \leftarrow V_3 \leftarrow V_2 \leftarrow V_1$ is an unblocked path from $V_7$ to $V_1$, it is not a half-trek from $V_7$ to $V_1$ because the direction of the edges is incorrect.  We refer to the set of vertices reachable by half-trek from a set of vertices, $V$, as $htr(V)$.

\begin{mydef}
\citep{foygel:12} For any half-trek, $\pi$, let \emph{Right($\pi$)} be the set of vertices in $\pi$ that have an outgoing directed edge in $\pi$ (as opposed to bidirected edge) union the last node in the trek.  In other words, if the trek is a directed path then every node in the path is a member of Right($\pi$).  If the trek begins with a bidirected edge then every node other than the first node is a member of Right($\pi$).
\end{mydef}

%For $\pi_1 = V_1 \rightarrow V_2 \rightarrow V_3 \rightarrow V_4 \rightarrow V_7$, Right$(\pi_1)=\{V_1, V_2, V_3, V_4, V_4\}$ since it is a directed path.  For $\pi_2 = V_1 \leftrightarrow V_2 \rightarrow V_3 \rightarrow V_4 \rightarrow V_7$, Right$(\pi_2)=\{V_2, V_3, V_4, V_7\}$ since it begins with a bidirected edge and continues with directed edges towards $V_7$.

\begin{mydef}
\citep{foygel:12} A system of half-treks, ${\pi_1, ..., \pi_n}$, has \emph{no sided intersection} if for all $\pi_i , \pi_j \in \{\pi_1, ..., \pi_n\}$ such that $\pi_i \neq \pi_j$, Right($\pi_i$)$\cap$Right($\pi_j$)$=\emptyset$.
\end{mydef}

\begin{mydef}
\citep{chen:etal14} For an arbitrary variable, $v$, let $Pa_1 , Pa_2 , ... , Pa_k$ be the unique partition of Pa(v) such that any two parents are placed in the same subset, $Pa_i$, whenever they are connected by an unblocked path (given the empty set).  A \emph{connected edge set} with head $v$ is a set of directed edges from $Pa_i$ to $v$ for some $i\in \{1, 2, ..., k\}$.  
\end{mydef}

%The system of half-treks, $\Pi=\{\pi_1, \pi_2\}$, has a sided intersection since Right$(\pi_1)\cap \mathrm{Right}(\pi_2)=\{V_2,V_3,V_4,V_7\}$.  Let $\pi_4=V_3\rightarrow V_4 \rightarrow V_7$ and $\pi_5=V_4\leftrightarrow V_1$.  The system of half-treks, $\Pi^{'}=\{\pi_4,\pi_5\}$, has no sided intersection even though $V_4$ appears in both treks since $V_4$ is not an element of Right$(\pi_5)$.

\section{General Half-Trek Criterion}

%\begin{figure}
%\caption{}
%\centering
%\includegraphics[width=0.3\textwidth]{esHT.png}
%\label{fig:eshtexample}
%\end{figure}

The half-trek criterion is a graphical condition that can be used to determine the identifiability of recursive and non-recursive linear models \citep{foygel:12}.  \citet{foygel:12} use the half-trek criterion to identify the model variables one at a time, where each identified variable may be able to aid in the identification of other variables.  If any variable is not identifiable using the half-trek criterion, then their algorithm returns that the model is not \emph{HTC-identifiable}.  Otherwise the algorithm returns that the model is identifiable.  Their algorithm subsumes the earlier methods of \citet{brito:pea02a} and \citet{brito:04}.  In this section, we extend the half-trek criterion to allow the identification of arbitrary subsets of edges belonging to a variable.  As a result, our algorithm can be utilized to identify as many coefficients as possible, even when the model is not identified.  Additionally, this extension improves our ability to identify entire models, as we will show.

\begin{mydef}
(General Half-Trek Criterion) Let $E$ be a set of directed edges sharing a single head $y$.  A set of variables $Z$ satisfies the \emph{general half-trek criterion} with respect to $E$, if 

\begin{enumerate}[(i)]
\item $|Z|=|E|$,
\item $Z\cap({y}\cup Sib(y))=\emptyset$, 
\item There is a system of half-treks with no sided intersection from $Z$ to $Ta(E)$, and
\item $(Pa(y)\setminus Ta(E))\cap htr(Z) = \emptyset$.
\end{enumerate}
\end{mydef}

A set of directed edges, $E$, sharing a head $y$ is identifiable if there exists a set, $Z_E$, that satisfies the general half-trek criterion (g-HTC) with respect to $E$, and $Z_E$ consists only of ``allowed'' nodes.  Intuitively, a node $z$ is allowed if $E_{zy}$ is identified or empty, where $E_{zy}\subseteq Inc(z)$ is the set of edges belonging to $z$ that lie on half-treks from $y$ to $z$ or lie on unblocked paths (given the empty set) between $z$ and $Pa(y) \setminus Ta(E)$.\footnote{We will continue to use the $E_{Zy}$ notation and allow $Z$ to be a set of nodes.} The following definition formalizes this notion.

\begin{mydef}
\label{def:allow}
A node, $z$, is \emph{g-HT allowed} (or simply \emph{allowed}) for directed edges $E$ with head $y$ if $E_{zy} = \emptyset$ or there exists sequences of sets of nodes, $(Z_1 , ... Z_k)$, and sets of edges, $(E_1 , ... , E_k)$, with $E_{zy}\subseteq E_1 \cup ... \cup E_k$ such that 
\begin{enumerate}[(i)]
\item $Z_i$ satisfies the g-HTC with respect to $E_i$ for all $i\in \{1, ... , k\}$,
\item $E_{Z_1 y_1}=\emptyset$, where $y_i = He(E_i)$ for all $i\in \{1, ... , k\}$, and
\item $E_{Z_i y_i}\subseteq (E_1 \cup ... \cup E_{i-1})$ for all $i\in \{1,... k\}$.
\end{enumerate}
\end{mydef}
When a set of allowed nodes, $Z_E$, satisfies the g-HTC for a set of edges $E$, then we will say that $Z_E$ is a \emph{g-HT admissible} set for $E$.  

%Since $Z_E$ can only consist of allowed nodes and whether or not $Z_E$ is allowed depends on the identifiability of edges outside of the set $E$, determining whether $E$ is identifiable may require identifying a sequence of edge sets, $(E_1 , ..., E_k)$, first.  The lemma below characterizes when a set of parameters is identifiable using the g-HTC.  

\begin{theorem}
\label{thm:htID}
If a g-HT admissible set for directed edges $E_y$ with head $y$ exists then $E_y$ is \emph{g-HT identifiable}.  Further, let $Z_{E_y}=\{z_1 , ..., z_k\}$ be a g-HT admissible set for $E_y$, $Ta(E_y)=\{p_1 , ..., p_k\}$, and $\Sigma$ be the covariance matrix of the model variables.  Define $\mathbf{A}$ as 
\begin{align}
\mathbf{A_{ij}}=\begin{cases}
[(I-\Lambda)^T \Sigma]_{z_i p_j}, & E_{z_i y} \neq \emptyset \\
\Sigma_{z_i p_j}, & E_{z_i y} = \emptyset
\end{cases}
\end{align}
and  $\mathbf{b}$ as
\begin{align}
\mathbf{b_{i}}=\begin{cases}
[(I-\Lambda)^T \Sigma]_{z_i y}, &  E_{z_i y} \neq \emptyset \\
\Sigma_{z_i y}, &  E_{z_i y} = \emptyset
\end{cases}
\end{align}
Then $\mathbf{A}$ is an invertible matrix and $\mathbf{A} \cdot \Lambda_{Ta(E_y),y}= \mathbf{b}$.  
\end{theorem}
\begin{proof}
See Appendix for proofs of all theorems and lemmas.
\end{proof}
%\begin{proof}
%See Appendix.
%%The proof for this theorem is similar to the proof of Theorem 1 in \citet{foygel:12}.  Rather than giving a complete proof, we simply explain why our changes are valid. The g-HTC identifies arbitrary sets of directed edges belonging to a node rather than all of the directed edges belonging to a node.  It is able to do this because of two changes.  First, sets that contain nodes that are connected to $Pa(v) \setminus Ta(E)$ via half-treks cannot be half-trek admissible for $E$ (see Definition 6).  As a result, the paths from half-trek admissible set, $Y_E$, to $v$ travel only through coefficients of $E$ and no other coefficients of $E$.  This ensures that $\mathbf{A}\cdot \Lambda_{Ta(E),v} =\mathbf{b}$.  Second, nodes that are connected to $Pa(v)\setminus Ta(E)$ are not allowed unless their coefficients that lie on paths to $Pa(v)\setminus Ta(E)$ are identified.  Likewise, nodes that are half-trek reachable from $v$ are not allowed unless their coefficients that lie on the half-treks from $v$ are identified.  This ensures that $\mathbf{A}$ and $\mathbf{b}$ are computable.  Other coefficients need not be identified because they will vanish from $\mathbf{A}$ and $\mathbf{b}$ during the computations, $((I-\Lambda)^T \cdot \Sigma)_{y_i p_j}$ and $((I-\Lambda)^T \cdot \Sigma)_{y_i v}$, due to zeroes in the matrix $\Sigma$.
%\end{proof}

\begin{figure}
\centering
\includegraphics[width=0.25\textwidth]{IDexample2.png}
\caption{The above model is identified using the g-HTC but not the HTC.}
\label{fig:IDexample2}
\end{figure}

The g-HTC impoves upon the HTC because subsets of a variable's coefficients may be identifiable even when the variable is not.  By identifying subsets of a variable's coefficients, we not only allow the identification of as many coefficients as possible in unidentified models, but we also are able to identify additional models as a whole.  For example, Figure \ref{fig:IDexample2} is not identifiable using the HTC.  In order to identify $Y$, $Z_2$ needs to be identified first as it is the only variable with a half-trek to $X_2$ without being a sibling of $Y$.  However, to identify $Z_2$, either $Y$ or $W_1$ needs to be identified.  Finally to identify $W_1$, $Y$ needs to be identified.  This cycle implies that the model is not HTC-identifiable. It is, however, g-HTC identifiable since the g-HTC allows $d$ to be identified independently of $f$, using $\{Z_1\}$ as a g-HT admissible set, which in turn allows $\{Y\}$ to be a g-HT admissible set for $W_1$'s coefficient, $a$.  

Finding a g-HT admissible set for directed edges, $E$, with head, $y$, from a set of allowed nodes, $A_E$, can be accomplished by utilizing the max-flow algorithm described in \citet{chen:etal14}\footnote{\citet{brito:04} utilized a similar max-flow construction in his identification algorithm.}, which we call $\mathrm{MaxFlow}(G, E, A_E)$.  This algorithm returns a maximal set of allowed nodes that satisfies (ii) - (iv) of the g-HTC. 

In some cases, there may be no g-HT admissible set for $E^{'}$ but there may be one for $E\subset E^{'}$.  In other cases, there may be no g-HT admissible set of variables for a set of edges $E$ but there may be a g-HT admissible set of variables for $E^{'}$ with $E\subset E^{'}$.  As a result, if a HT-admissible set does not exist for $E_y$, where $E_y = Inc(y)$ for some node $y$, we may have to check whether such a set exists for all possible subsets of $E_y$ in order to identify as many coefficients in $E_y$ as possible.  This process can be somewhat simplified by noting that if $E$ is a connected edge set with no g-HT admissible set, then there is no superset $E^{'}$ with a g-HT admissible set.  

An algorithm that utilizes the g-HTC and Theorem \ref{thm:htID} to identify as many coefficients as possible in recursive or non-recursive linear SEMs is given in the Appendix.  Since we may need to check the identifiability of all subsets of a node's edges, the algorithm's complexity is polynomial time if the degree of each node is bounded.  

\section{Generalizing Overidentifying Constraints}

\citet{chen:etal14} discovered overidentifying constraints by finding two HT-admissible sets for a given connected edge set.  When two such sets exist, we obtain two distinct expressions for the identified coefficients, and equating the two expressions gives the overidentifying constraint.  However, we may be able to obtain constraints even when $|Z_E| < |E|$ and $E$ is not identified.  The algorithm, $\mathrm{MaxFlow}$, returns a maximal set, $Z_E$, for which the equations, $\mathbf{A}\cdot \Lambda_{Ta(E),y} = \mathbf{b}$, are linearly independent, regardless of whether $|Z_E|=|E|$ and $E$ is identified or not.  Therefore, if we are able to find an allowed node $w$ that satisfies the conditions below, then the equation $a_w \cdot \Lambda_{Ta(E),y}=b_w$ will be a linear combination of the equations, $\mathbf{A}\cdot \Lambda_{Ta(E),y} = \mathbf{b}$.  

\begin{theorem}
\label{thm:constraint}
Let $Z_E$ be a set of maximal size that satisfies conditions (ii)-(iv) of the g-HTC for a set of edges, $E$, with head $y$.  If there exists a node $w$ such that there exists a half-trek from $w$ to Ta(E), $w\notin (y \cup Sib(y))$, and $w$ is g-HT allowed for $E$,
%\begin{enumerate}[(i)]
%\item there exists a half-trek from $w$ to Ta(E),
%\item $w\notin (v \cup Sib(v))$, and
%\item $w$ is g-HT allowed for $E$,
%\end{enumerate}
then we obtain the equality constraint, $\mathbf{a_w} \mathbf{A}^{-1}_{\mathrm{right}} \mathbf{b} = b_w$, where $\mathbf{A}^{-1}_{\mathrm{right}}$ is the right inverse of $\mathbf{A}$.
\end{theorem}

%\begin{proof}
%See Appendix.
%
%%As long as conditions (ii) and (iii) of the g-HTC are satisfied by $Y_e$, the rows of $\mathbf{A}$ are linearly independent and $\mathbf{A} \cdot \Lambda_{Ta(e),v} = \mathbf{b}$.  (See the proof of Theorem 1 in \citep{foygel:12}.)  Similarly, if $w$ satisfies the above conditions then $\mathbf{a_w}\cdot \Lambda_{Ta(e),v}=b_w$.  Additionally, since $Y_E$ is a maximal set for which there exists a system of half-treks from $Y_E$ to $Ta(E)$ with no sided intersection, there does not exist a system of half-treks from $Y_E \cup \{w\}$ to $Ta(E)$ with no sided intersection.  According to \citet{foygel:12}, this implies that $\mathbf{a_w}=\mathbf{d}^T \cdot \mathbf{A}$ and $\mathbf{b_w}=\mathbf{d}^T \cdot \mathbf{b}$ for some vector $\mathbf{d}$.  In other words, the equation $\mathbf{a_w}\cdot \Lambda_{Ta(e),v}=b_w$ is a linear combination of the equations represented by $\mathbf{A} \cdot \Lambda_{Ta(e),v} = \mathbf{b}$.  As a result, we obtain the constraint $\mathbf{a_w} \mathbf{A}^{-1}_{\mathrm{right}} \mathbf{b} = b_w$.
%\end{proof}

We will call these generalized overidentifying constraints, \emph{half-trek constraints} or \emph{HT-constraints}.  An algorithm that identifies coefficients and finds HT-constraints for a recursive or non-recursive linear SEM is given in the Appendix.
%Algorithm \ref{alg:constraints} can be used to identify coefficients and find HT-constraints given a graph of the model, $G$.  Like Algorithm \ref{alg:ID}, it iterates through each connected edge set, attempting to identify it.  However, after finding a maximal set that satisfies (ii)-(iv) of the g-HTC using $\mathrm{MaxFlow}$, it looks for a node $w$ that satisfies the conditions of Theorem \ref{thm:constraint} in order to obtain a HT-constraint.  Prior to recursive decomposition, if a node $z$ is d-separated from a node $v$, we trivially obtain the constraint that $\Sigma_{zv}=0$.  However, when we introduce recursive decomposition, we will see that the independence constraint on the sub-model corresponds to a non-conditional independence constraint in the joint distribution, $P(V)$.  As a result, Algorithm \ref{alg:constraints} also outputs when variables are d-separated from one another given the empty set.  

%\begin{algorithm}[H]
%\caption{HT-Constraints($G,\Sigma, \mathrm{IDEdges}$)}
%\label{alg:constraints}
%\begin{algorithmic}
%\STATE {\bfseries Initialize:} $\mathrm{EdgeSets}\leftarrow$ all connected edge sets in $G$
%\REPEAT
%	\FORALL{$ES$ in $\mathrm{EdgeSets}$}
%		\FORALL{$E\subset ES$ such that $E\not\subset \mathrm{IDEdges}$}
%			\STATE $A_E \leftarrow \mathrm{Allowed}(E, \mathrm{IDEdges}, G)$
%			\STATE $Y_E \leftarrow \mathrm{MaxFlow}(G_f (v,A_E))$
%			\IF{$|Y_E|=|Ta(E)|$}
%				\STATE Identify $E$ using Theorem \ref{thm:htID}
%				\STATE $\mathrm{IDEdges} \leftarrow \mathrm{IDEdges} \cup E$
%			\ENDIF
%			\FORALL{$w$ in $A_E\setminus Y_E$}
%				\IF{$v \in htr(w)$}
%					%\State Generate matrix $\mathbf{A}$ and vectors $\mathbf{b}, \mathbf{a_w}, \mathbf{b_w}$ according to Theorem \ref{thm:htID}
%					\STATE Output constraint: $\mathbf{b_w} = \mathbf{a_w} \cdot \mathbf{A^{-1}_{\mathrm{Right}}} \cdot \mathbf{b}$
%				\ELSIF{$w\notin htr(v)$}
%					\STATE Output constraint: $\Sigma_{wv}=0$					
%				\ENDIF
%			\ENDFOR
%		\ENDFOR
%	\ENDFOR
%\UNTIL{one iteration after all edges are identified or no new edges have been identified in the last iteration}
%\RETURN IDEdges
%\end{algorithmic}
%\end{algorithm}

\section{Decomposition}
\label{sec:c-comp}

\begin{figure*}
\centering
\begin{subfigure}[b]{.35\textwidth}
\includegraphics[width=\textwidth]{decompexample.png}
\caption{}
\label{fig:decomp}
\end{subfigure}
\begin{subfigure}[b]{.3\textwidth}
\includegraphics[width=\textwidth]{decomp_marg.png}
\caption{}
\label{fig:decomp_marg}
\end{subfigure}


\begin{subfigure}[b]{.3\textwidth}
\includegraphics[width=\textwidth]{decomp1.png}
\caption{}
\label{fig:decomp1}
\end{subfigure}
\begin{subfigure}[b]{.235\textwidth}
\includegraphics[width=\textwidth]{decomp2.png}
\caption{}
\label{fig:decomp2}
\end{subfigure}
\caption{(a) The graph is not identified using the g-HTC and cannot be decomposed (b) After removing $V_6$ we are able to decompose the graph (c) Graph for c-component, $\{V_2 , V_3 , V_5\}$ (d) Graph for c-component, $\{V_1 , V_4\}$}
\end{figure*}
%
%\begin{figure}
%\caption{}
%\centering
%\begin{subfigure}[m]{.3\textwidth}
%\caption{}
%\label{fig:decomp1}
%\includegraphics[width=\textwidth]{decomp1.png}
%\end{subfigure}
%\begin{subfigure}[m]{.235\textwidth}
%\caption{}
%\label{fig:decomp2}
%\includegraphics[width=\textwidth]{decomp2.png}
%\end{subfigure}
%\end{figure}

%\citet{tian2005identifying} showed that the identification problem could be simplified in semi-Markovian linear structural equation models by decomposing the model into sub-models according to their c-components, defined below.  Each coefficient is identifiable if and only if it is identifiable in the sub-model to which it belongs.  \citet{foygel:12} noted that first decomposing the model in this way and then applying the half-trek criterion allows for the identification of a larger set of models.  In this section, we will briefly review the results of \citet{tian2005identifying} before showing that the c-component decomposition can be applied recursively to the model after marginalizing certain variables.  This idea was first used to identify interventional distributions in non-parameteric models by \citet{tian:02} and \citet{tian:pea02} and adapting this technique for linear models will allow us to identify models that the g-HTC, even coupled with (non-recursive) c-component decomposition, is unable to identify.  Further, it ensures the identification of all coefficients identifiable using methods developed for non-parametric models--a guarantee that none of the existing methods developed for linear models satisfy.  

Tian showed that the identification problem could be simplified in semi-Markovian linear structural equation models by decomposing the model into sub-models according to their \emph{c-components} \citep{tian2005identifying}.  Each coefficient is identifiable if and only if it is identifiable in the sub-model to which it belongs \citep{tian2005identifying}.  In this section, we show that the c-component decomposition can be applied recursively to the model after marginalizing certain variables.  This idea was first used to identify interventional distributions in non-parameteric models by \citet{tian:02} and \citet{tian:pea02} and adapting this technique for linear models will allow us to identify models that the g-HTC, even coupled with (non-recursive) c-component decomposition, is unable to identify.  Further, it ensures the identification of all coefficients identifiable using methods developed for non-parametric models--a guarantee that none of the existing methods developed for linear models satisfy.  

%\subsection{C-Component Decomposition}
%
%\begin{mydef}
%\citep{tian2005identifying} The \emph{c-component} of a node $v$ in a causal graph, denoted $C(v)$, is the set of nodes that is connected to $v$ by paths consisting only of bidirected arcs.
%\end{mydef}
%
%\citet{tian2005identifying} showed that a coefficient is identified if and only if it is identified in the sub-graph consisting of its c-component and the parents of the c-component.  More formally, a coefficient from $x$ to $y$ is identified if and only if it is identified in the sub-model constructed in the following way:
%\begin{enumerate}[(i)]
%\item The sub-model variables consist of $C(y)\cup Pa(C(y))$.
%\item The structural equations for the variables in $C(y)$ are the same as their structural equations in the original model while the structural equations for the parents simply equate each parent with its error term.  
%\item If the error terms of any two variables in the sub-model were uncorrelated in the original model then they are uncorrelated in the sub-model.
%\end{enumerate}
%
%When we decompose the model according to c-components, the distribution over the variables in the sub-model, $W = S\cup Pa(S)$, for a c-component $S$, is not simply the marginal distribution over $W$.  Instead, the distribution, which we denote $P_S$, is computed from the joint distribution over the model variables, $P(V)$.  Letting $V=\{v_1 , v_2 , ... , v_n\}$ be ordered topologically, we have 
%\begin{equation}
%\label{eq:P}
%P_S (W) = \prod_{\{i|v_i \in S\}} P(v_i | V^{(i-1)}) \prod_{\{l | v_l \in Pa(S)\}} P(v_l),
%\end{equation}
%where $V^{(i-1)} = \{v_1 , v_2 , ... , v_{i-1}\}$.
%
%For example, consider the graph depicted in Figure \ref{fig:decomp_marg}.  We have two c-components, $S_1 = \{v_2 , v_3 , v_5\}$ and $S_2 = \{v_1 , v_4\}$, with \begin{align*}P_{S_1} = &P(v_2 | v_1) P(v_3 | v_2 , v_1) P(v_5 | v_4 , v_3 , v_2 , v_1) \\ &P(v_1) P(v_4)\end{align*} and \begin{equation*}P_{S_2} =  P(v_1) P(v_4 | v_3 , v_2 , v_1)P(v_3)P(v_2)P(v_3).\end{equation*} 
%
%We will denote the sub-model for a c-component, $S$, $M_S$ and the graph it induces $G_S$.  $G_{S_1}$ is depicted in Figure \ref{fig:decomp1} and $G_{S_2}$ in Figure \ref{fig:decomp2}.
%
%\begin{theorem}
%\citep{tian2005identifying} Let a variable $v_j$ be in a c-component $S_j$ in a SEM $M$.  A coefficient, $\Lambda_{ij}$, is identifiable if and only if it is identifiable in the model $M_{S_j}$.  
%\end{theorem}

The graph in Figure \ref{fig:decomp} consists of a single c-component, and we are unable to decompose it.  As a result, we are able to identify $a$ but no other coefficients using the g-HTC.  Moreover, $f = \frac{\partial}{\partial v_4}E[v_5|do(v_6, v_4 , v_3 , v_2 , v_1)]$ is identified using identification methods developed for non-parametric models (e.g. do-calculus) but not the g-HTC or other methods developed for linear models.  

However, if we remove $v_6$ from the analysis, then the resulting model can be decomposed.  Let $M$ be the model depicted in Figure \ref{fig:decomp}, $P(v)$ be the distribution induced by $M$, and $M^{'}$ be a model that is identical to $M$ except the equation for $v_6$ is removed.  $M^{'}$ induces the distribution $\int_{v_6} P(V) d v_6$, and its associated graph $G^{'}$ yields two c-components, as shown in Figure \ref{fig:decomp_marg}.  

Now, decomposing $G^{'}$ according to these c-components yields the sub-models depicted by Figures \ref{fig:decomp1} and \ref{fig:decomp2}.  Both of these sub-models are identifiable using the half-trek criterion.  Thus, all coefficients other than $h$ have been shown to be identifiable.  Returning to the graph prior to removal, depicted in Figure \ref{fig:decomp}, we are now able to identify $h$ because both $v_4$ and $v_5$ are now allowed nodes for $h$, and the model is identified\footnote{While $v_4$ and $v_5$ are technically not allowed according to Definition \ref{def:allow}, they can be used in g-HT admissible sets to identify $h$ using Theorem \ref{thm:htID} since their coefficients have been identified.}.

As a result, we can improve our identification and constraint-discovery algorithm by recursively decomposing, using the g-HTC and Theorem \ref{thm:constraint}, and removing descendant sets\footnote{Only removing descendant sets have the ability to break up components.  For example, removing $\{v_2\}$ from Figure \ref{fig:decomp} does not break the c-component because removing $v_2$ would relegate its influence to the error term of its child, $v_3$.  As a result, the graph of the resulting model would include a bidirected arc between $v_3$ and $v_6$, and we would still have a single c-component.}.  Note, however, that we must consider every descendant set for removal.  It is possible that removing $D_1$ will allow identification of a coefficient but removing a superset $D_2$ with $D_1 \subset D_2$ will not.  Additionally, it is possible that removing $D_2$ will allow identification but removing a subset $D_1$ will not.  

After recursively decomposing the graph, if some of the removed variables were unidentified, we may be able to identify them by returning to the original graph prior to removal since we may have a larger set of allowed nodes.  For example, we were able to identify $h$ in Figure \ref{fig:decomp} by ``un-removing" $v_6$ after the other coefficients were identified.  In some cases, however, we may need to again recursively decompose and remove descendant sets.  As a result, in order to fully exploit the powers of decomposition and the g-HTC, we must repeat the recursive decomposition process on the original model until all marginalized nodes are identified or no new coefficients are identified in an iteration.

Clearly, recursive decomposition also aids in the discovery of HT-constraints in the same way that it aids in the identification of coefficients using the g-HTC.  However, note that recursive decomposition may also introduce additional d-separation constraints.  Prior to decomposition, if a node $Z$ is d-separated from a node $V$ then we trivially obtain the constraint that $\Sigma_{ZV}=0$.  However, in some cases, $Z$ may become d-separated from $V$ after decomposition.  In this case, the independence constraint on the covariance matrix of the decomposed c-component corresponds to a non-conditional independence constraint in the original joint distribution $P(V)$.  It is for this reason that we output independence constraints in Algorithm 2 (see Appendix).

For example, consider the graph depicted in Figure \ref{fig:isoZ}.  Theorem \ref{thm:constraint} does not yield any constraints for the edges of $V_7$.  However, after decomposing the graph we obtain the c-component for $\{V_2, V_5, V_7\}$, shown in Figure \ref{fig:isoZ2}.  In this graph, $V_1$ is d-separated from $V_7$ yielding a non-independence constraint in the original model.  

\begin{figure}
\centering
\begin{subfigure}[b]{.22\textwidth}
\includegraphics[width=\textwidth]{isoZ.png}
\caption{}
\label{fig:isoZ}
\end{subfigure}
\begin{subfigure}[b]{.22\textwidth}
\includegraphics[width=\textwidth]{isoZ2.png}
\caption{}
\label{fig:isoZ2}
\end{subfigure}
\caption{(a) $V_1$ cannot be d-separated from $V_7$ (b) $V_1$ is d-separated from $V_7$ in the graph of the c-component, $\{V_2 , V_5 , V_7\}$}
\end{figure}

We can systematically identify coefficients and HT-constraints using recursive c-component decomposition by repeating the following steps for the model's graph $G$ until the model has been identified or no new coefficients are identified in an iteration:
\begin{enumerate}[(i)]
\item Decompose the graph into c-components, $\{S_i\}$
\item For each c-component, utilize the g-HTC and Theorems \ref{thm:htID} and \ref{thm:constraint} to identify coefficients and find HT-constraints
\item For each descendant set, marginalize the descendant set and repeat steps (i)-(iii) until all variables have been marginalized
\end{enumerate}

If a coefficient $\alpha$ can be identified using the above method (see also Algorithm 3 in the Appendix, which utilizes recursive decomposition to identify coefficients and output HT-constraints), then we will say that $\alpha$ is \emph{g-HTC identifiable}.  

%Now, we are ready to apply recursive c-component decomposition to identify coefficients and constraints.  Algorithm \ref{alg:recID} decomposes the graph according to its c-components and then applies Algorithm \ref{alg:constraints} to each sub-model.  If there are still unidentified coefficients, then it removes descendant sets and decomposes again.  The whole process is repeated until one iteration after every coefficient is identified or no new coefficients are identified in an iteration.  $\Sigma_{P_{S_i}}$ is the covariance matrix of $P_{S_i}$, where $S_i$ is a c-component.  $\Sigma_{V\setminus D_i}$ is the covariance matrix after marginalizing $D_i$ from $\Sigma$.  Finally, $G_{V\setminus D_i}$ is the graph with the set $D_i$ removed.  

%\begin{algorithm}[H]
%\caption{Decomp-HT($G, \Sigma$)}
%\label{alg:recID}
%\begin{algorithmic}
%\STATE {\bfseries Initialize:} $\mathrm{IDEdges}\leftarrow \emptyset$
%\REPEAT
%	\STATE $\mathrm{IDEdges} \leftarrow \mathrm{IDEdges}\cup$Rec-Decomp$(G, \Sigma, \mathrm{IDEdges}$)
%\UNTIL{One iteration after all coefficients have been identified or no coefficients have been identified}
%\STATE
%\RETURN IDEdges
%\end{algorithmic}
%\end{algorithm}
%
%\begin{algorithm}[H]
%\caption{Rec-Decomp($G, \Sigma, \mathrm{IDEdges}$)}
%\label{alg:rec-decomp}
%\begin{algorithmic}
%	\STATE $V\leftarrow$ vertices in $G$
%	\STATE $\mathrm{Edges}\leftarrow$ all edges in $G$
%	\FORALL {c-component, $S_i$, in $G$}
%		\STATE $\mathrm{IDEdges} = \mathrm{IDEdges} \cup$ HT-Constraints$(G_{S_i}, \Sigma_{S_i}, \mathrm{IDEdges})$
%	\ENDFOR
%	\IF{$\mathrm{IDEdges}=\mathrm{Edges}$}
%		\STATE Return $\mathrm{IDEdges}$
%	\ELSE
%		\FORALL {descendant set, $D_i$, in $G$}
%			\STATE $\mathrm{IDEdges}\leftarrow \mathrm{IDEdges}\cup $Rec-Decomp$(G_{V\setminus D_i} , \Sigma_{V\setminus D_i}, \mathrm{IDEdges})$
%		\ENDFOR
%	\ENDIF
%\STATE
%\RETURN IDEdges
%\end{algorithmic}
%\end{algorithm}

We now show that any direct effect identifiable using non-parametric methods is also g-HTC identifiable.

\begin{theorem}
\label{thm:npid}
Let $M$ be a linear SEM with variables $V$.  Let $M^{'}$ be a non-parametric SEM with identical structure to $M$.  If the direct effect of $x$ on $y$ for $x,y \in V$ is identified in $M^{'}$ then the coefficient $\Lambda_{xy}$ in $M$ is g-HTC identifiable and can be identified using Algorithm 3 (see Appendix).
\end{theorem}
%
%\begin{proof}
%See Appendix.
%%Let $G$ be the causal graph of $M$ and $M^{'}$.  Suppose the direct effect of $x$ on $y$ is identified in $M^{'}$.  Then according to Theorem 3 of \citep{shpitser:08}, there does not exist a subgraph of $G$ that is a $y$-rooted c-tree \citep{shpitser:08}.  This implies that $MACS(y) = y$.  By recursively decomposing the graph into c-components and marginalizing descendant sets, we can obtain a graph where only $MACS(y)$ and its parents remain in the graph.  Since $MACS(Y)=y$, the parents of $y$ in this graph represent a g-HT admissible set that allows the identification of all coefficients of $y$.  
%\end{proof}

\section{Non-Parametric Verma Constraints}

\citet{tian:pea02c} and \citet{shpitser:pea08a} provided algorithms for discovering Verma constraints in recursive, non-parametric models.  In this section, we will show that the constraints obtained by the above method and Algorithm 3 (see Appendix) subsume the constraints discovered by both methods when applied to linear models.  First, we will show that the constraints identified in \citep{tian:pea02c}, which we call \emph{Q-constraints}, are subsumed by HT-constraints.  Second, we will show that the constraints given by \citet{shpitser:pea08a}, called dormant independences, are, in fact, equivalent to the constraints given by \citet{tian:pea02c} for linear models.  As a result, both dormant independences and Q-constraints are subsumed by HT-constraints.

\subsection{Q-Constraints}

We refer to the constraints enumerated in \citep{tian:pea02c} as Q-constraints since they are discovered by identifying Q-factors, which are defined below.

\begin{mydef}
\label{def:Q-factor}
For any subset, $S\subseteq V$, the Q-factor, $Q_S$, is given by 
\begin{equation}
\label{eq:q}
Q_S = \int_{\epsilon_S} \prod_{i|V_i \in S} P(v_i|pa_i , \epsilon_i)P(\epsilon_S)d \epsilon_S,
\end{equation}
where $\epsilon_S$ contains the error terms of the variables in $S$.  
\end{mydef}

A Q-factor, $Q_S$, is identifiable whenever $S$ is a c-component \citep{tian:pea02}.

%The Lemma below gives a 

\begin{lemma}
\label{lem:c-comp}
\citep{tian:pea02} Let $\{v_1 , ... , v_n\}$ be sorted topologically, $S$ be a c-component, $V^{(i)} = \{v_1 , ... , v_i\}$, and $V^{(0)} = \emptyset$.  Then $Q_S$ can be computed as $Q_S = \prod_{\{i|v_i \in S\}} P(v_i | V^{(i-1)}), j = 1, ..., k.$
\end{lemma}

For example, consider again Figure \ref{fig:decomp_marg}.  We have that $Q_1 = P(v_1) P(v_4 | v_3 , v_2 , v_1)$ and $Q_2 = P(v_2 | v_1) P(v_3 | v_2 , v_1) P(v_5 | v_4 , v_3 , v_2 , v_1)$.

A Q-factor can also be identified by marginalizing out descendant sets \citep{tian:pea02}.  Suppose that $Q_S$ is identified and $D$ is a descendant set in $G_S$, then \begin{equation}\label{eq:marg}Q_{S_i \setminus D} = \sum_{D} Q_{S_i}.\end{equation}  If the marginalization over $D$ yields additional c-components in the marginalized graph, then we can again compute each of them from $Q_{S\setminus D}$ \citep{tian:pea02c}.

%\begin{lemma}
%\label{lem:recursive_decomp}
%\citep{tian:pea02c} Assume $H\subseteq V$ is partitioned into c-components $H_1 , ... , H_l$ in the subgraph $G_H$.  Let $k$ be the number of variables in $H$ and a topological order of the variables in $H$ be $v_{h_1} < ... < v_{h_k}$ in $G(H)$.  Additionally, let $H^{(i)} = \{v_{h_1} , ... , v_{h_k}\}$ be the set of variables in $H$ ordered before $v_{h_i}$ (including $v_{h_i}$), $i=1, ...,k$, and $H^{(0)} = \emptyset$.  Then each $Q_{H_j}, j = 1, ..., l$, is given by $Q_{H_j} = \prod_{\{i|v_{h_i} \in H_j\}} \frac{Q_{H^{(i)}}}{Q_{H^{(i-1)}}}$, where each $Q_{H^{(i)}}$, $i = 0,1,...,k$ is given by $Q_{H^{(i)}}=\sum_{h\setminus h^{(i)}} Q_H$.
%\end{lemma}

Tian's method recursively computes the Q-factors associated with c-components, marginalizes descendant sets in the graph for the computed Q-factor, and again computes Q-factors associated with c-components in the marginalized graph.  The Q-constraint is obtained in the following way.  The definition of a Q-factor, $Q_S$, given by Equation \ref{eq:q} is a function of $Pa(S)$ only.  However, the equivalent expression given by Lemma \ref{lem:c-comp} and Equation \ref{eq:marg} may be functions of additional variables.  %As a result, the expression given by \citet{tian:pea02c}, which utilizes Lemma \ref{lem:recursive_decomp} and Equation \ref{eq:marg}, may contain variables that are not parents of $S$, and we obtain a constraint that the given expression is a function of $Pa(S)$ only.  We will denote the Q-constraint, $Q_S$ is not a function of $Z$, as $Q_S \perp Z$.  

\begin{figure}
\centering
\includegraphics[width=0.25\textwidth]{linear_verma.png}
\caption{The above graph induces the Verma constraint, $Q[v_4]$ is not a function of $v_1$, and equivalently, $v_4 \perp v_1 | do(v_3)$.}
\label{fig:verma}
\end{figure}

For example, in Figure \ref{fig:verma}, $\{v_2, v_4\}$ is a c-component so we can identify $Q_{v_2 v_4} = P(v_4|v_3 , v_2 , v_1) P(v_2 | v_1).$  The decomposition also makes $v_2$ a leaf node in $G_{v_2 v_4}$.  As a result, we can identify $Q_{v_4} = \int_{v_2} P(v_4|v_3 , v_2 , v_1) P(v_2 | v_1) dv_2.$  Since $v_1$ is not a parent of $v_4$ in $G_{v_4}$, we have that $Q_{v_4} = \int_{v_2} P(v_4|v_3 , v_2 , v_1) P(v_2 | v_1) dv_2 \perp v_1.$

%We will now show that Q-constraints are subsumed by HT-constraints in linear models.  Consider a Q-constraint, $Q_S$ is not a function of $Z$.  This constraint is obtained through some sequence of c-component decomposition and marginalization of descendant sets.  In the last step, $Q_S$ is identified from $Q_{S\cup W}$ for some $W$ such that $Z\in W\cup Pa(W)$.  Let $G^{'}=G_{S\cup W\cup Pa(W)}$.  Now $Q_S$ is not a function of $Z$ implies that $Z\indep_{G^{'}} S | Pa(S)$ since $Z$ must be ordered before $S$ and, therefore, $Z\neq De(S)$.  Similarly, $Z\indep_{G^{'}} S | Pa(S)$ implies that $Q_S$ is not a function of $Z$.  As a result, the Q-constraint is obtained if and only if $Z\indep_{G^{'}} S | Pa(S)$, where $Z$ is ordered before $S$, and a Q-constraint is equivalent to a conditional independence constraint in the distribution, $P_{S\cup W}$. 
%
%Now, this constraint is also a HT-constraint because it is obtainable using Theorem \ref{thm:constraint} on $G^{'}$, and $G^{'}$ is obtainable from recursive c-component decomposition.  $Pa(S)$ satisfies conditions (i), (iii), and (iv) of the extended half-trek criterion for the edges from $Pa(S)$ to $S$ while $Z$ is not half-trek reachable from $S$ and either has a half-trek to $S$ or is separated entirely from $S$.  In both cases, the HT-constraint is equivalent to the conditional independence constraint $Z\perp S | Pa(S)$ in the distribution, $P_{S\cup W}$, and we have proven the following theorem.  

%%%%%%%%%%% IS Z A SINGLETON OR A SET? %%%%%%%%%%%

\begin{theorem}
\label{thm:Qsubsumed}
Any Q-constraint, $Q_S\perp Z$, in a linear SEM, has an equivalent set of HT-constraints that can be discovered using Algorithm 3 (see Appendix).
\end{theorem}
%\begin{proof}
%See Appendix.
%%Consider a Q-constraint, $Q_S$ is not a function of $Z$.  This constraint is obtained through some sequence of c-component decomposition and marginalization of descendant sets.  In the last step, $Q_S$ is identified from $Q_{S\cup W}$ for some $W$ such that $Z\subset W\cup Pa(W)$.  Let $G^{'}=G_{S\cup W}$.  Now $Q_S$ is not a function of $Z$ implies that $Z\indep_{G^{'}} S | Pa(S)$ since $Z$ must be ordered before $S$ and, therefore, $Z\neq De(S)$.  Similarly, $Z\indep_{G^{'}} S | Pa(S)$ implies that $Q_S$ is not a function of $Z$.  As a result, the Q-constraint is obtained if and only if $Z\indep_{G^{'}} S | Pa(S)$, where $Z$ is ordered before $S$, and a Q-constraint is equivalent to a conditional independence constraint in the distribution, $P_{S\cup W}$. 
%%
%%Since pairwise independence implies independence in normal distributions, the constraint $Z\indep S | Pa(S)$ is equivalent to the set of conditional independences, $\{z_i \indep S | Pa(S)\}$, where $z_i \in Z$.  We now show that there exists an equivalent HT-constraint for each conditional independence, $z_i \indep S | Pa(S)$ in the distribution $P_{S\cup W}$.  $G^{'}$ is obtainable from recursive c-component decomposition, and, in $G^{`}$, $Pa(S)$ satisfies conditions (i)-(iii) of the g-HTC for the edges from $Pa(S)$ to $S$.  Additionally, $z_i$ is not half-trek reachable from $S$ and either has a half-trek to $S$ or is separated entirely from $S$.  In both cases, we obtain a HT-constraint that is equivalent to the conditional independence constraint $Z\perp S | Pa(S)$ in the distribution, $P_{S\cup W}$.  
%\end{proof}

\subsection{Dormant Independences}

Dormant independences have a natural interpretation as independence and conditional independence constraints within identifiable interventional distributions \citep{shpitser:pea08a}.  For example, in Figure \ref{fig:verma}, the distribution after intervention on $v_3$ can be represented graphically by removing the edge from $v_2$ to $v_3$ since $v_3$ is no longer a function of $v_2$ but is instead a constant.  In the resulting graph, $v_4$ is d-separated from $v_1$ implying that $v_4$ is independent of $v_1$ in the distribution, $P(v_4, v_2, v_1 | do(v_3))$.  In other words, $P(v_4 | do(v_3) , v_1)=P(v_4|do(v_3))$.  Now, it is not hard to show that $P(v_4|v_1, do(v_3))$ is identifiable and equal to $\sum_{v_2} P(v_4 | v_3 , v_2 , v_1) P(v_2 | v_1)$ and we obtain the constraint that $\sum_{v_2} P(v_4 | v_3 , v_2 , v_1) P(v_2 | v_1)$ is not a function of $v_1$, which is exactly the Q-constraint we obtained above. 

It turns out that dormant independences among singletons and Q-constraints are equivalent, as stated by the following lemma. 

\begin{lemma}
\label{lem:DI}
Any dormant independence, $x\indep y | w , do(Z)$, with $x$ and $y$ singletons has an equivalent Q-constraint and vice versa.
\end{lemma}
%\begin{proof}
%See Appendix.
%%Since Q-constraints can be understood as unconditional dormant independence \citep{shpitser:pea08a}, we only need to show that each dormant independence has an equivalent Q-constraint.
%
%%Let $MACS(Z)$ denote the \emph{maximal ancestral confounded set} of $Z$ \citep{shpitser:pea08a}, the maximal set in which $MACS(Z)=Anc(Z)_{G(MACS(Z))}=C(Z)_{G(MACS(Z))}$, where $G(MACS(Z))$ is the subgraph of $G$ containing only the variables in $MACS(Z)$ and $C(Z)$ is the c-component of $Z$.  
%%
%%According to Theorem 6 of \citet{shpitser:pea08a}, there exists a dormant independence between singletons, $x$ and $y$, if and only if $x$ is not a parent of $MACS(y)$, $y$ is not a parent of $MACS(x)$, and there is no bidirected arc between $MACS(x)$ and $MACS(y)$.  In this case, $x\indep y|do(Pa(MACS(x) \cup MACS(y)), (MACS(x)\cup (MACS(y)\setminus \{x,y\}$.  Now, it is not hard to show using results from \citep{tian:02} that $Q_{MACS(y)}$ is identifiable.  Further, since there is no bidirected arc between $MACS(x)$ and $MACS(y)$, it is possible to identify $Q_{MACS(y)}$ without marginalizing over $x$.  Finally, we know that $x\notin Pa(MACS(y))$ so we obtain the Q-constraint, $Q_{MACS(y)}$ is not a function of $x$.  
%%
%%Now, we will show that the Q-constraint, $Q_{MACS(y)}\perp x$ also implies the dormant independence, $x\indep y|do(Pa(MACS(x) \cup MACS(y)), (MACS(x)\cup (MACS(y)\setminus \{x,y\}$.  In proving Theorem 5, we showed that $Q_{MACS(y)}\perp x$ implies that $y \indep x|Pa(S)$ in some distribution, $Q_{S\cup W}$, where $y\in S$ and $x\in W$.  Recalling that a Q-factor is just an interventional distribution, we have a dormant independence between $x$ and $y$.  Since Theorem 6 of \citep{shpitser:pea08a} gives a necessary and sufficient condition for dormant independence between $x$ and $y$, we also have that $x\indep y|do(Pa(MACS(x) \cup MACS(y)), (MACS(x)\cup (MACS(y)\setminus \{x,y\}$.  
%
%\end{proof}

Since pairwise independence implies independence in normal distributions, Lemma \ref{lem:DI} and Theorem \ref{thm:Qsubsumed} imply the following theorem.

\begin{theorem}
\label{thm:DIsubsumed}
Any dormant independence among sets, $x\indep y | W, do(Z)$, in a linear SEM, has an equivalent set of HT-constraints that can be discovered by incorporating recursive c-component decomposition with Algorithm 3 (see Appendix).
\end{theorem}

\section{Conclusion}

In this paper, we extend the half-trek criterion \citep{foygel:12} and generalize the notion of overidentification to discover constraints using the generalized half-trek criterion, even when the coefficients are not identified.  We then incorporate recursive c-component decomposition and show that the resulting identification method is able to identify more models and constraints than the existing linear and non-parameteric algorithms.  

Finally, we note that while we were preparing this manuscript for submission, \cite{drton:wei16} independently introduced a similar idea to the recursive decomposition discussed in this paper, which they called ancestor decomposition. While ancestor decomposition is more efficient, recursive decomposition is more general in that it enables the identification of a larger set of coefficients.

\section{Acknowledgments}

I would like to thank Jin Tian and Judea Pearl for helpful comments and discussions.  This research was supported in parts by grants from NSF \#IIS-1302448 and \#IIS-1527490 and ONR \#N00014-13-1-0153 and \#N00014-13-1-0153.

\bibliography{book}  
\bibliographystyle{ims}
\end{document}
