# Supplementary material
Source: ML conference proceedings conference paper supplement (https://proceedings.neurips.cc/paper_files/paper/2016/hash/49c9adb18e44be0711a94e827042f630-Abstract.html)

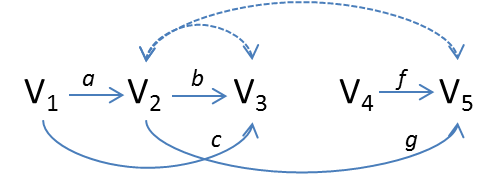

Supplement: Supplementary file 3 [file 49c9adb18e44be0711a94e827042f630-Supplemental.zip › decomp1.png]

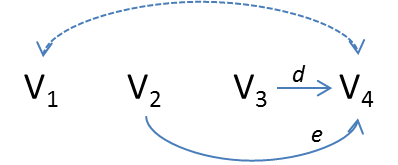

Supplement: Supplementary file 3 [file 49c9adb18e44be0711a94e827042f630-Supplemental.zip › decomp2.png]

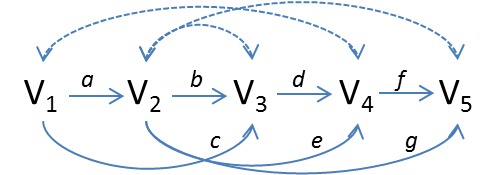

Supplement: Supplementary file 3 [file 49c9adb18e44be0711a94e827042f630-Supplemental.zip › decomp_marg.png]

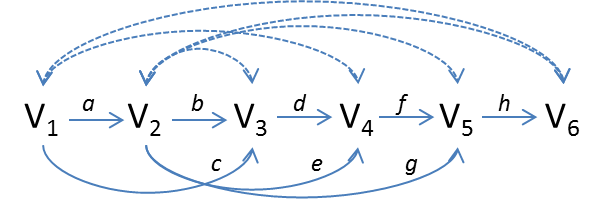

Supplement: Supplementary file 3 [file 49c9adb18e44be0711a94e827042f630-Supplemental.zip › decompexample.png]

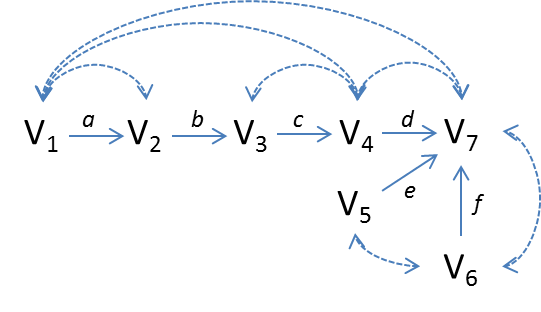

Supplement: Supplementary file 3 [file 49c9adb18e44be0711a94e827042f630-Supplemental.zip › esHT.png]

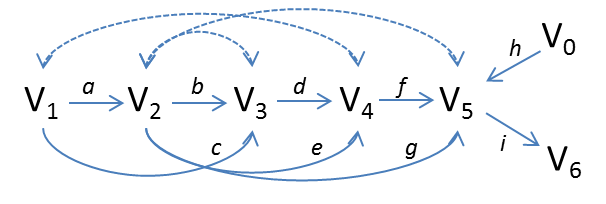

Supplement: Supplementary file 3 [file 49c9adb18e44be0711a94e827042f630-Supplemental.zip › g-HTC.png]

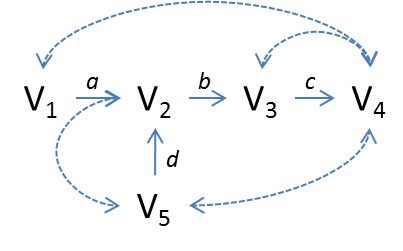

Supplement: Supplementary file 3 [file 49c9adb18e44be0711a94e827042f630-Supplemental.zip › HT_notID.png]

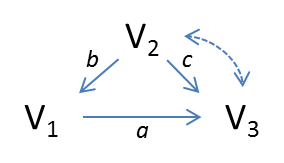

Supplement: Supplementary file 3 [file 49c9adb18e44be0711a94e827042f630-Supplemental.zip › IDex2.png]

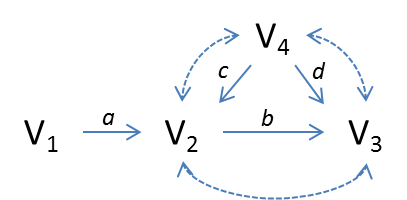

Supplement: Supplementary file 3 [file 49c9adb18e44be0711a94e827042f630-Supplemental.zip › IDexample.png]

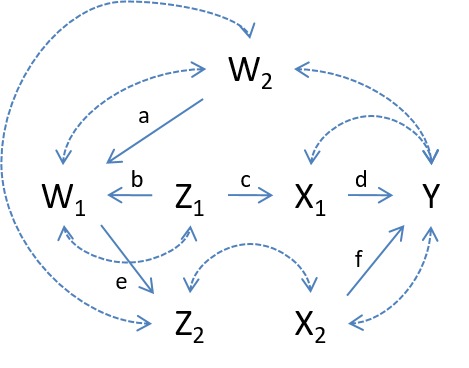

Supplement: Supplementary file 3 [file 49c9adb18e44be0711a94e827042f630-Supplemental.zip › IDexample2.png]

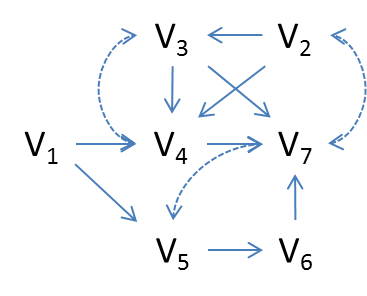

Supplement: Supplementary file 3 [file 49c9adb18e44be0711a94e827042f630-Supplemental.zip › isoZ.png]

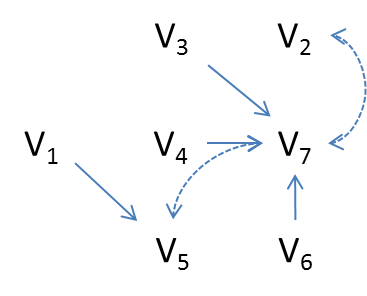

Supplement: Supplementary file 3 [file 49c9adb18e44be0711a94e827042f630-Supplemental.zip › isoZ2.png]

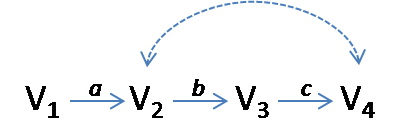

Supplement: Supplementary file 3 [file 49c9adb18e44be0711a94e827042f630-Supplemental.zip › linear_verma.png]

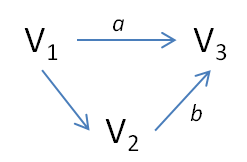

Supplement: Supplementary file 3 [file 49c9adb18e44be0711a94e827042f630-Supplemental.zip › med.png]

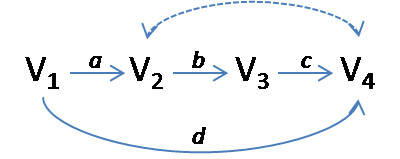

Supplement: Supplementary file 3 [file 49c9adb18e44be0711a94e827042f630-Supplemental.zip › modifiedverma.png]
